# Supplementary material for: Co-mutations in tumor immune microenvironment and immunotherapy
Source: PubMed Central journal article supplement — Chin Med J (Engl). 2021 Apr 13;134(9):1055–7. doi: 10.1097/CM9.0000000000001455 (PMC8115994; doi:10.1097/cm9.0000000000001455), 2021-04-13
Supplement: cm9-134-1055-s001.pdf [file cm9-134-1055-s001.pdf]

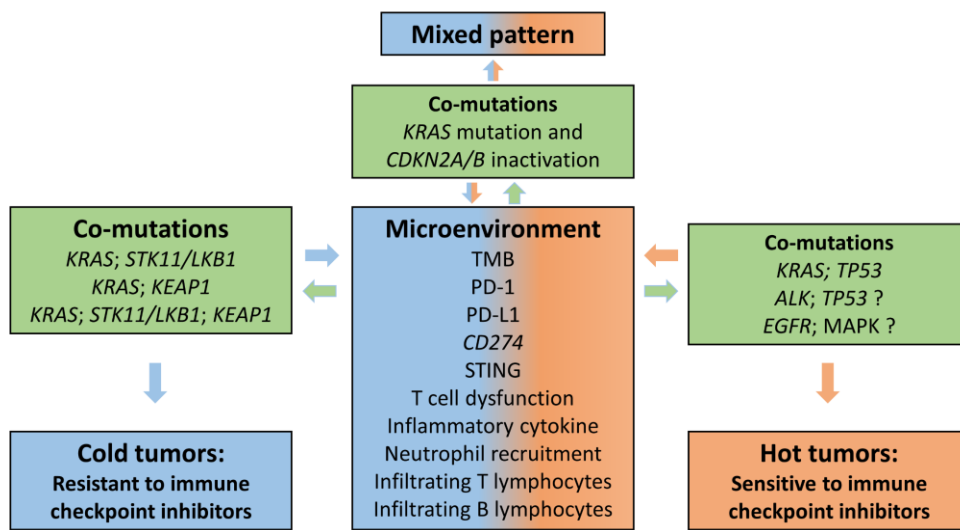

**Supplementary Figure 1:** Schematic diagram of the relationships among co-mutations, tumor immune microenvironment, and immunotherapy. *ALK*: ALK receptor tyrosine kinase; *CDKN2A/B*: Cyclin-dependent kinase inhibitor 2A/B; *EGFR*: Epidermal growth factor receptor; *KEAP1*: Kelch-Like ECH-associated protein 1; *KRAS*: Kirsten rat sarcoma viral oncogene homolog; *MAPK*: Mitogen-activated protein kinase; *PD-1*: Programmed cell death 1; *PD-L1*: Programmed death ligand-1; *STING*: Stimulator of interferon genes; *STK11/LKB1*: Serine/threonine kinase 11/liver kinase B1; *TMB*: Tumor mutational burden; *TP53*: Tumor protein p53.
